# Supplementary material for: Effect of Temperature Cycling Pretreatment on the Thermal Stability of Sm2(Co, Fe, Zr, Cu)17 Magnets in the Mild Temperature Range
Source: MDPI journal article supplement (doi:10.3390/ma15248830), 2022-12-10
Supplement: s1 [file s1]

# Effect of Temperature Cycling Pretreatment on the Thermal Stability of $\text{Sm}_2(\text{Co}, \text{Fe}, \text{Zr}, \text{Cu})_{17}$ Magnets in the Mild Temperature Range

Hu-Lin Wu <sup>1</sup>, Zhi-Mei Long <sup>2</sup>, Zhong-Sheng Li <sup>1</sup>; Kai-Qiang Song <sup>1</sup>, Chao-Qun Li <sup>2</sup>, Da-Long Cong <sup>1</sup>, Bin Shao <sup>2,\*</sup>, Xiao-Wei Liu <sup>2</sup>, Jian-Chun Sun <sup>2</sup>, and Yi-Long Ma <sup>2</sup>

<sup>1</sup> Southwest Institute of Technology and Engineering, Chongqing 400039, China; wuhulin59@163.com (W.H.-L.); zhongshli59@163.com (L.Z.-S.); scut\_song@163.com (S.K.-Q.); congdl09@163.com (C.D.-L.)

<sup>2</sup> School of Metallurgy and Material Engineering, Chongqing University of Science and Technology, Chongqing 401331, China; 2021202024@cqust.edu.cn (L.Z.-M.); 2020202022@cqust.edu.cn (L.C.-Q.); lxwicq@163.com (L.X.-W.); Kwensun@163.com (S.J.-C.); yilongma@163.com (M.Y.-L.)

\* Correspondence: shaobin19811107@163.com

**Table S1.** Temperature dependence of  $\Phi$  and their losses of samples from R.T. to 750 °C.

| Temperature/°C   | $\Phi/\text{mWb}$ | Loss of $\Phi/\%$ |
|------------------|-------------------|-------------------|
| Room Temperature | 17.34             | 0.00              |
| 80               | 16.88             | 2.65              |
| 120              | 16.85             | 2.83              |
| 150              | 16.84             | 2.88              |
| 180              | 16.8              | 3.11              |
| 220              | 16.78             | 3.23              |
| 250              | 16.75             | 3.40              |
| 300              | 16.67             | 3.86              |
| 350              | 16.23             | 6.40              |
| 400              | 14.76             | 14.88             |
| 450              | 12.75             | 26.47             |
| 500              | 10.37             | 40.20             |
| 550              | 7.84              | 54.79             |
| 650              | 3.24              | 81.31             |
| 750              | 0.69              | 96.02             |

**Table S2.**  $\Phi$  and their losses of samples cycled in the range of R.T. 180 °C and −50 °C — 180 °C.

| Temperature range | Cycle number | $\Phi/\text{mWb}$ | Loss of $\Phi/\%$ |
|-------------------|--------------|-------------------|-------------------|
| R.T. — 180 °C     | 0            | 17.34             | 0.00              |
|                   | 10           | 17.21             | 0.75              |
|                   | 20           | 17.18             | 0.98              |
|                   | 40           | 17.15             | 1.04              |
|                   | 60           | 17.11             | 1.33              |
|                   | 80           | 17.08             | 1.52              |
|                   | 100          | 17.04             | 1.73              |
|                   | 125          | 17.05             | 1.67              |
| −50 °C — 180 °C   | 0            | 17.08             | 0.00              |
|                   | 10           | 16.92             | 0.92              |

|  |     |       |      |
|--|-----|-------|------|
|  | 20  | 16.89 | 1.13 |
|  | 40  | 16.84 | 1.39 |
|  | 60  | 16.82 | 1.50 |
|  | 80  | 16.78 | 1.76 |
|  | 100 | 16.75 | 1.95 |
|  | 125 | 16.72 | 2.13 |

**Table S3.** Values of fitting parameters and their standard errors (S.E.) in the different temperature range. The fitting formulae are given by  $Y=A \times (X-X_c)^P$ .

| Y              | Temperature range | Fitting Parameter |             |      |           |      |           |       |
|----------------|-------------------|-------------------|-------------|------|-----------|------|-----------|-------|
|                |                   | $X_c$             | $S.E.(X_c)$ | A    | $S.E.(A)$ | P    | $S.E.(P)$ | $R^2$ |
| Loss of $\Phi$ | R.T. — 180 °C     | 0.00              | 10.49       | 0.34 | 0.18      | 0.33 | 0.11      | 0.97  |
|                | −50 °C — 180 °C   | 0.00              | 6.34        | 0.42 | 0.13      | 0.33 | 0.06      | 0.99  |

**Table S4.** The  $\Phi$  and their losses of samples recycled in the range of R.T. to 180, 250, and 300 °C, respectively.

| Temperature range | Cycle number / - | $\Phi$ / mWb | Loss of $\Phi$ /% |
|-------------------|------------------|--------------|-------------------|
| R.T.–180 °C       | 0                | 17.34        | 0.00              |
|                   | 10               | 17.21        | 0.75              |
|                   | 20               | 17.18        | 0.98              |
|                   | 40               | 17.15        | 1.04              |
|                   | 60               | 17.11        | 1.33              |
|                   | 80               | 17.08        | 1.52              |
|                   | 100              | 17.04        | 1.73              |
|                   | 125              | 17.05        | 1.67              |
| R.T. — 250 °C     | 0                | 17.84        | 0.00              |
|                   | 10               | 17.67        | 0.95              |
|                   | 20               | 17.58        | 1.48              |
|                   | 40               | 17.57        | 1.53              |
|                   | 60               | 17.51        | 1.85              |
|                   | 80               | 17.48        | 2.00              |
|                   | 100              | 17.45        | 2.17              |
|                   | 125              | 17.43        | 2.30              |
| R.T.–300 °C       | 0                | 17.19        | 0.00              |
|                   | 10               | 16.98        | 1.24              |
|                   | 20               | 16.91        | 1.65              |
|                   | 40               | 16.85        | 2.00              |
|                   | 60               | 16.79        | 2.31              |
|                   | 80               | 16.76        | 2.48              |
|                   | 100              | 16.74        | 2.64              |
|                   | 125              | 16.70        | 2.85              |

**Table S5.** The  $\Phi$  and their losses of samples hold in air at 80, 120, and 180 °C for different days, respectively.

| Constant temperature/°C | Holding time/Day | Untreated   |                   | Pretreatment: −50 °C–250 °C × 3 cycles |                   |
|-------------------------|------------------|-------------|-------------------|----------------------------------------|-------------------|
|                         |                  | $\Phi$ /mWb | Loss of $\Phi$ /% | $\Phi$ /mWb                            | Loss of $\Phi$ /% |
| 80 °C                   | original         | /           | /                 | 17.16                                  | 0.00              |
|                         | 0                | 17.20       | 0.00              | 16.90                                  | 1.40              |
|                         | 22               | 17.01       | 1.47              | 16.82                                  | 1.90              |

|        |          |       |      |       |      |
|--------|----------|-------|------|-------|------|
|        | 45       | 16.93 | 1.91 | 16.80 | 2.01 |
|        | 60       | 16.89 | 2.12 | 16.79 | 2.07 |
|        | 90       | 16.84 | 2.43 | 16.78 | 2.10 |
|        | 120      | 16.81 | 2.59 | 16.76 | 2.25 |
|        | 150      | 16.81 | 2.63 | 16.74 | 2.33 |
|        | 180      | 16.79 | 2.72 | 16.72 | 2.43 |
| 120 °C | original | /     | /    | 17.16 | 0.00 |
|        | 0        | 17.26 | 0.00 | 16.89 | 1.46 |
|        | 22       | 17.01 | 1.85 | 16.82 | 1.95 |
|        | 45       | 16.91 | 2.42 | 16.79 | 2.08 |
|        | 60       | 16.86 | 2.71 | 16.77 | 2.20 |
|        | 90       | 16.85 | 2.75 | 16.75 | 2.31 |
|        | 120      | 16.84 | 2.83 | 16.74 | 2.41 |
|        | 150      | 16.80 | 3.04 | 16.72 | 2.51 |
|        | 180      | 16.78 | 3.17 | 16.70 | 2.56 |
| 180 °C | original | /     | /    | 17.19 | 0.00 |
|        | 0        | 17.33 | 0.00 | 16.89 | 1.63 |
|        | 22       | 16.98 | 2.06 | 16.82 | 2.15 |
|        | 45       | 16.86 | 2.71 | 16.79 | 2.36 |
|        | 60       | 16.83 | 2.88 | 16.77 | 2.47 |
|        | 90       | 16.81 | 3.04 | 16.76 | 2.53 |
|        | 120      | 16.80 | 3.06 | 16.74 | 2.62 |
|        | 150      | 16.77 | 3.23 | 16.73 | 2.70 |
|        | 180      | 16.75 | 3.38 | 16.70 | 2.79 |

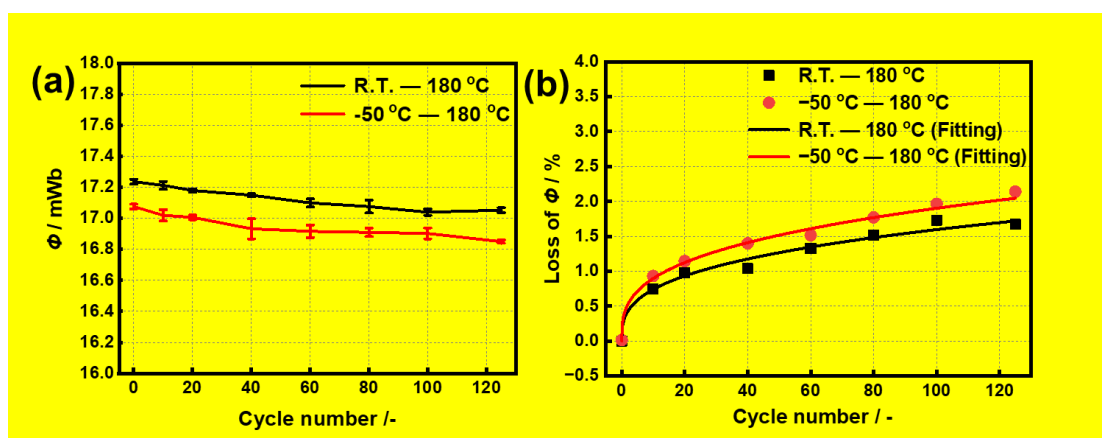

Figure S1. Variation trends of (a)  $\Phi$ , (b) The fitting curve of the loss of  $\Phi$  during recycling between the R.T. and 180 °C, and between the -50 °C and 180 °C for 125 cycles, respectively.

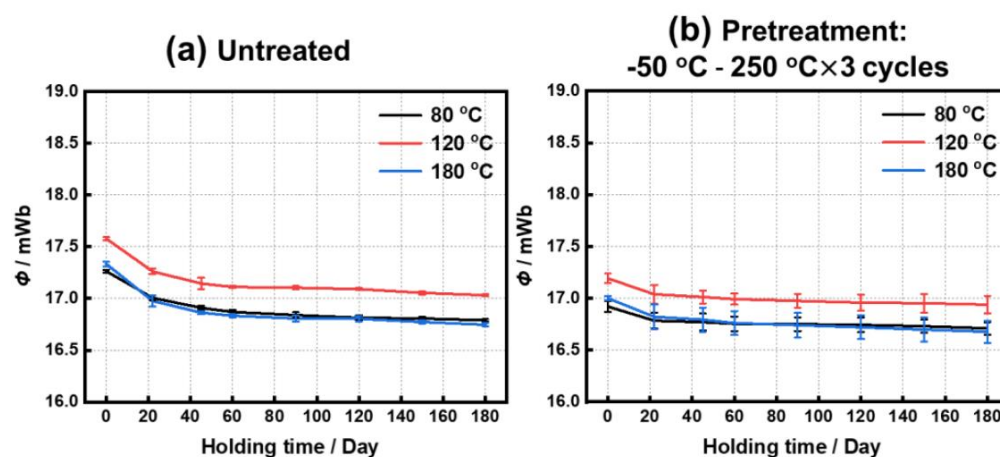

Figure S2. Variation trends of  $\Phi$  of (a) untreated and (b) pretreated samples held in air at 80, 120, and 180 °C for 180 days, respectively.
